# Supplementary material
Source: ML conference proceedings conference paper supplement (https://openreview.net/forum?id=JvYSSPtQyk)
Supplement: supplementary_material [file attachment]

## A Details of Baseline Models

In our experiments, we implement five baseline systems using *fairseq*: S2UT, Translatotron, UnitY, Translatotron 2, and TranSpeech. We reproduce TranSpeech with their open-source implementations<sup>9</sup>. In this section, we mainly introduce the configurations of the other four baseline systems.

Figure 2 shows the model architectures of these models. In terms of model architecture, S2UT and Translatotron are single-pass S2ST models while UnitY and Translatotron 2 are two-pass S2ST models. In terms of predicted targets, S2UT and UnitY predict discrete units while Translatotron and Translatotron 2 predict mel-spectrograms. Below we describe the details of each model. The detailed hyperparameters can be found in Table 5.

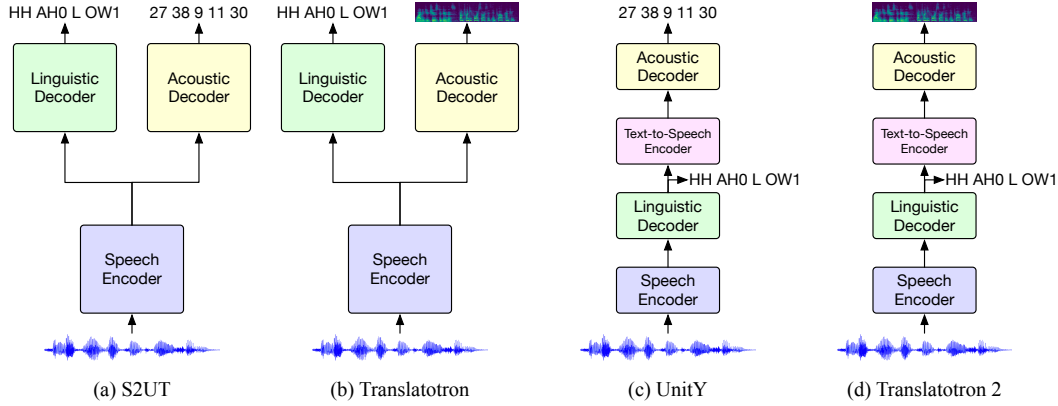

Figure 2: Overview of baseline models.

**S2UT** Our implemented S2UT model includes three parts: a speech encoder, a linguistic decoder, and an acoustic decoder. The speech encoder is the same as DASpeech. The linguistic decoder is appended to the top layer of the speech encoder for multi-task learning, which predicts the target phonemes during training. The acoustic decoder generates the reduced discrete units derived from the 11-th layer of the pretrained mHuBERT model<sup>10</sup>. We do not include other auxiliary tasks and remove CTC decoding in Lee et al. [5] for simplification. The model is trained from scratch for 100k steps. We use beam search with a beam size of 10.

**Translatotron** The speech encoder and linguistic decoder of Translatotron are the same as S2UT. The acoustic decoder generates mel-spectrograms autoregressively. The pre-net dimension is 32 and the reduction factor of the acoustic decoder is 5. The model is trained from scratch for 100k steps.

**UnitY** UnitY is a two-pass model that includes four parts: a speech encoder, a linguistic decoder, a text-to-speech encoder, and an acoustic decoder. The architecture of the speech encoder, linguistic decoder, and acoustic decoder are the same as S2UT. The additional text-to-speech encoder is used to bridge the gap in representations between two decoders. We remove R-Drop training for simplification. We first conduct S2TT pretraining and finetune the model for 50k steps. We set the beam size of the first-pass and second-pass decoder to 10 and 1, respectively.

**Translatotron 2** The model architecture of Translatotron 2 is similar to UnitY except that the second decoder generates mel-spectrograms rather than discrete units. The reduction factor of the acoustic decoder is set to 5. We first conduct S2TT pretraining and finetune the model for 50k steps. The beam size is set to 10 for the first-pass decoder.

For all the above models, we save checkpoints every 2000 steps and average the last 5 checkpoints for evaluation, which is the same as DASpeech. For S2UT and UnitY, we use the pretrained unit-based HiFi-GAN<sup>11</sup> vocoder to synthesize waveform. For Translatotron and Translatotron 2, we use the same pretrained HiFi-GAN vocoder as DASpeech.

<sup>9</sup><https://github.com/Rongjiehuang/TranSpeech>

<sup>10</sup>[https://dl.fbaipublicfiles.com/hubert/mhubert\\_base\\_vp\\_en\\_es\\_fr\\_it3\\_L11\\_km1000.bin](https://dl.fbaipublicfiles.com/hubert/mhubert_base_vp_en_es_fr_it3_L11_km1000.bin)

<sup>11</sup>[https://dl.fbaipublicfiles.com/fairseq/speech\\_to\\_speech/vocoder/code\\_hifigan/mhubert\\_vp\\_en\\_es\\_fr\\_it3\\_400k\\_layer11\\_km1000\\_lj/g\\_00500000](https://dl.fbaipublicfiles.com/fairseq/speech_to_speech/vocoder/code_hifigan/mhubert_vp_en_es_fr_it3_400k_layer11_km1000_lj/g_00500000)

Table 5: Hyperparameters of DASpeech and baseline models.

| Hyperparameters        |                            | S2UT         | Translatotron | UnitY        | Translatotron 2 | DASpeech     |
|------------------------|----------------------------|--------------|---------------|--------------|-----------------|--------------|
| Speech Encoder         | conv_kernel_sizes          | (5, 5)       | (5, 5)        | (5, 5)       | (5, 5)          | (5, 5)       |
|                        | encoder_type               | conformer    | conformer     | conformer    | conformer       | conformer    |
|                        | encoder_layers             | 12           | 12            | 12           | 12              | 12           |
|                        | encoder_embed_dim          | 256          | 256           | 256          | 256             | 256          |
|                        | encoder_ffn_embed_dim      | 2048         | 2048          | 2048         | 2048            | 2048         |
|                        | encoder_attention_heads    | 4            | 4             | 4            | 4               | 4            |
|                        | encoder_pos_enc_type       | relative     | relative      | relative     | relative        | relative     |
| Linguistic Decoder     | depthwise_conv_kernel_size | 31           | 31            | 31           | 31              | 31           |
|                        | decoder_layers             | 4            | 4             | 4            | 4               | 4            |
|                        | decoder_embed_dim          | 512          | 512           | 512          | 512             | 512          |
|                        | decoder_ffn_embed_dim      | 2048         | 2048          | 2048         | 2048            | 2048         |
|                        | decoder_attention_heads    | 8            | 8             | 8            | 8               | 8            |
|                        | label_smoothing            | 0.1          | 0.1           | 0.1          | 0.1             | 0.0          |
|                        | s2t_loss_weight            | 8.0          | 0.1           | 8.0          | 0.1             | 1.0          |
| Text-to-Speech Encoder | encoder_layers             | -            | -             | 2            | 2               | -            |
|                        | encoder_embed_dim          | -            | -             | 512          | 512             | -            |
|                        | encoder_ffn_embed_dim      | -            | -             | 2048         | 2048            | -            |
|                        | encoder_attention_heads    | -            | -             | 8            | 8               | -            |
| Acoustic Decoder       | decoder_layers             | 6            | 6             | 2            | 6               | 8            |
|                        | decoder_embed_dim          | 512          | 512           | 512          | 512             | 256          |
|                        | decoder_ffn_embed_dim      | 2048         | 2048          | 2048         | 2048            | 1024         |
|                        | decoder_attention_heads    | 8            | 8             | 8            | 8               | 4            |
|                        | label_smoothing            | 0.1          | -             | 0.1          | -               | -            |
|                        | n_frames_per_step          | 1            | 5             | 1            | 5               | 1            |
|                        | unit_dictionary_size       | 1000         | -             | 1000         | -               | -            |
|                        | var_pred_hidden_dim        | -            | -             | -            | -               | 256          |
|                        | var_pred_kernel_size       | -            | -             | -            | -               | 3            |
|                        | var_pred_dropout           | -            | -             | -            | -               | 0.5          |
|                        | s2s_loss_weight            | 1.0          | 1.0           | 1.0          | 1.0             | 5.0          |
| Training               | lr                         | 1e-3         | 1e-3          | 1e-3         | 1e-3            | 1e-3         |
|                        | lr_scheduler               | inverse_sqrt | inverse_sqrt  | inverse_sqrt | inverse_sqrt    | inverse_sqrt |
|                        | warmup_updates             | 4000         | 4000          | 4000         | 4000            | 4000         |
|                        | warmup_init_lr             | 1e-7         | 1e-7          | 1e-7         | 1e-7            | 1e-7         |
|                        | optimizer                  | Adam         | Adam          | Adam         | Adam            | Adam         |
|                        | dropout                    | 0.1          | 0.1           | 0.1          | 0.1             | 0.1          |
|                        | max_tokens                 | 40k×4        | 40k×4         | 40k×4        | 40k×4           | 40k×8        |
|                        | weight_decay               | 0.0          | 0.0           | 0.0          | 0.0             | 0.01         |
|                        | clip_norm                  | 1.0          | 1.0           | 1.0          | 1.0             | 1.0          |
|                        | max_update                 | 100k         | 100k          | 50k          | 50k             | 50k          |

## B Detailed Results on CVSS-C X→En Datasets

Table 6 summarizes the detailed results of each language pair on CVSS-C test sets of the multilingual X→En S2ST models.

Table 6: Results on CVSS-C test sets of the multilingual X→En S2ST models.

| Models                          |                 | Avg. | High  |       |       |       | Mid  |       |       |      |      |
|---------------------------------|-----------------|------|-------|-------|-------|-------|------|-------|-------|------|------|
|                                 |                 |      | Fr    | De    | Ca    | Es    | Fa   | It    | Ru    | Zh   | Pt   |
| S2UT [5]                        |                 | 5.15 | 19.65 | 13.35 | 15.37 | 18.58 | 1.43 | 14.47 | 7.94  | 0.93 | 6.42 |
| UnitY [7]                       |                 | 8.15 | 27.27 | 20.81 | 24.22 | 27.58 | 3.63 | 21.68 | 10.86 | 4.16 | 8.56 |
| Translatotron 2 [6]             |                 | 8.74 | 28.04 | 21.54 | 25.34 | 28.77 | 4.23 | 23.66 | 13.41 | 4.49 | 9.54 |
| DASpeech<br>( $\lambda = 0.5$ ) | + Lookahead     | 7.42 | 25.43 | 17.87 | 22.58 | 25.49 | 3.01 | 20.80 | 12.96 | 2.86 | 7.90 |
|                                 | + Joint-Viterbi | 7.43 | 25.39 | 18.36 | 22.33 | 25.10 | 2.81 | 20.76 | 12.94 | 3.05 | 7.89 |

| Models                          |                 | Low   |      |      |      |      |      |      |      |      |      |      |      |
|---------------------------------|-----------------|-------|------|------|------|------|------|------|------|------|------|------|------|
|                                 |                 | Nl    | Tr   | Et   | Mn   | Ar   | Lv   | Sl   | Sv   | Cy   | Ta   | Ja   | Id   |
| S2UT [5]                        |                 | 4.67  | 0.52 | 0.36 | 0.14 | 0.56 | 0.39 | 0.73 | 1.28 | 0.66 | 0.17 | 0.20 | 0.38 |
| UnitY [7]                       |                 | 10.60 | 3.79 | 1.07 | 0.12 | 0.78 | 1.50 | 0.81 | 1.38 | 1.74 | 0.10 | 0.15 | 0.27 |
| Translatotron 2 [6]             |                 | 11.17 | 4.58 | 1.12 | 0.32 | 1.35 | 1.37 | 0.93 | 1.49 | 1.50 | 0.10 | 0.22 | 0.33 |
| DASpeech<br>( $\lambda = 0.5$ ) | + Lookahead     | 9.04  | 1.75 | 0.04 | 0.08 | 0.64 | 1.43 | 1.20 | 1.33 | 0.70 | 0.09 | 0.29 | 0.29 |
|                                 | + Joint-Viterbi | 9.43  | 1.66 | 0.07 | 0.08 | 0.48 | 1.48 | 1.30 | 1.30 | 0.85 | 0.09 | 0.31 | 0.32 |

## 654 C Effects of the Graph Size

655 In this section, we investigate how the graph size affects the performance. We vary the size factor  
 656  $\lambda$  from 0.25 to 1.5, and measure the translation quality of both the S2TT DA-Transformer model  
 657 and DASpeech on the CVSS-C Fr→En test set. As shown in Figures 3 and 4, we observe that  
 658 the performance of S2TT DA-Transformer keeps increasing as the graph size gets larger, which is  
 659 consistent with the observations in machine translation [11, 53]. However, DASpeech performs best  
 660 at  $\lambda = 0.5$  and shows a performance drop at larger  $\lambda$ . We speculate that this is because larger graph  
 661 size makes end-to-end training more challenging. We will investigate this issue in the future.

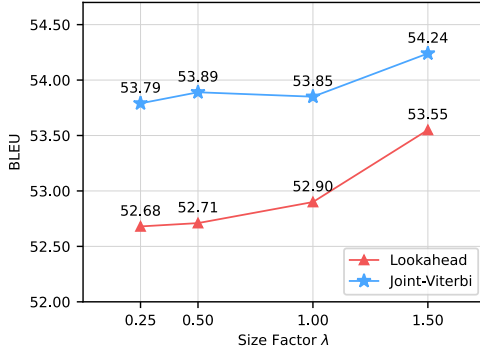

Figure 3: Phoneme-level BLEU scores of the S2TT DA-Transformer under different size factor  $\lambda$ .

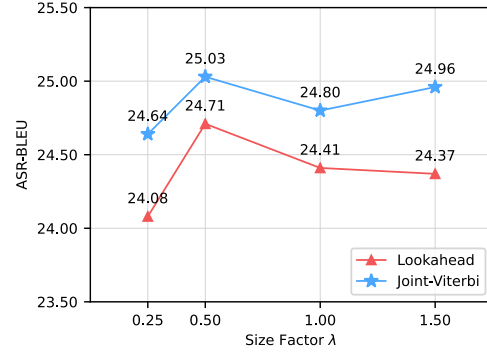

Figure 4: ASR-BLEU scores of DASpeech under different size factor  $\lambda$ .

## 662 D Speedup Under Batch Decoding

663 As Gu and Kong [41] pointed out, the speed benefits of non-autoregressive models may degrade  
 664 during batch decoding. To better understand this problem, we evaluate the speedup ratio under  
 665 different decoding batch sizes. As shown in Figure 5, the speedup ratio keeps dropping as the  
 666 decoding batch size increases. Nevertheless, DASpeech ( $\lambda = 0.5$  with Joint-Viterbi decoding)  
 667 still achieves more than  $6\times$  speedup with a decoding batch size of 64 and maintains comparable  
 668 performance with Translatotron 2.

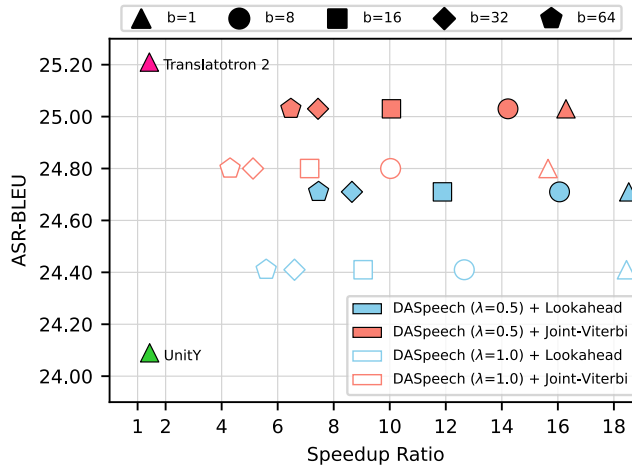

Figure 5: Speedup ratio compared to S2UT baseline (not shown in the figure) and ASR-BLEU score on the CVSS-C Fr→En test set with different batch decoding sizes ( $b \in \{1, 8, 16, 32, 64\}$ ).

## 669 E Best-Path Training

670 Best-path-training selects the most probable path  $\hat{A} = (\hat{a}_1, \dots, \hat{a}_M)$  and takes the hidden states on  
 671 path  $\hat{A}$  as input to the acoustic decoder. Formally, given the target phoneme sequence  $Y$ , we can find  
 672 the most probable path  $\hat{A} = \arg \max_{A \in \Gamma} P_\theta(Y, A|X)$  via Viterbi algorithm [20]. Specifically, we use  
 673  $\delta_i(j)$  to denote the probability of the most probable path so far  $(\hat{a}_1, \dots, \hat{a}_i)$  with  $\hat{a}_i = j$  that generates  
 674  $(y_1, \dots, y_i)$ . Considering the definition of  $a_1 = 1$ , we have  $\delta_1(1) = \mathbf{P}_{1,y_1}$  and  $\delta_1(1 < j \leq L) = 0$ .  
 675 For  $i > 1$ , we can sequentially calculate  $\delta_i(\cdot)$  from its previous step  $\delta_{i-1}(\cdot)$  due to the Markov  
 676 property:

$$\delta_i(j) = \max_{k < j} (\delta_{i-1}(k) \cdot \mathbf{E}_{k,j} \cdot \mathbf{P}_{j,y_i}), \quad (16)$$

$$\phi_i(j) = \arg \max_{k < j} (\delta_{i-1}(k) \cdot \mathbf{E}_{k,j} \cdot \mathbf{P}_{j,y_i}), \quad (17)$$

678 where  $\phi_i(j)$  stores  $\hat{a}_{i-1}$  of the most probable path so far  $(\hat{a}_1, \dots, \hat{a}_{i-1}, \hat{a}_i = j)$ . After  $M$  iterations,  
 679 we can obtain the most probable path by backtracking from  $\hat{a}_M = L$ :

$$\hat{a}_i = \phi_{i+1}(\hat{a}_{i+1}). \quad (18)$$

680 Finally, we select the hidden states on the most probable path, i.e.,  $\mathbf{z}_i = \mathbf{v}_{\hat{a}_i}$ , as the input sequence of  
 681 the acoustic decoder.
